# Supplementary material for: Short-Term Effects of Ambient Air Pollution on Hospitalization for Respiratory Disease in Taiyuan, China: A Time-Series Analysis
Source: PubMed Central journal article supplement (PMC6210308; doi:10.3390/ijerph15102160), 2018-10-01
Supplement: ijerph-15-02160-s001.pdf [file ijerph-15-02160-s001.pdf]

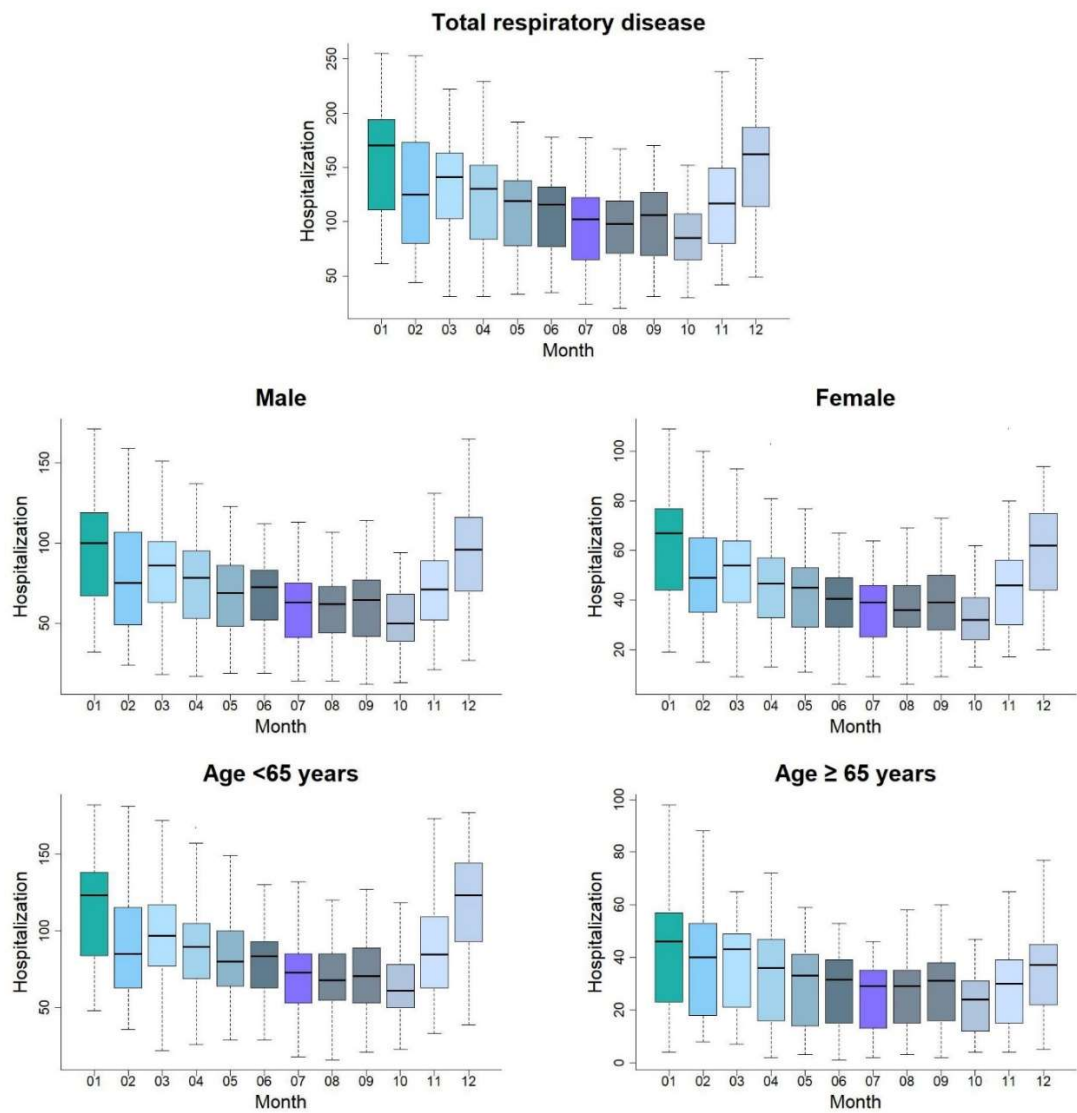

**Figure S1.** Boxplots of monthly hospitalization due to respiratory disease by gender and age in Taiyuan, China during 2014–2017.

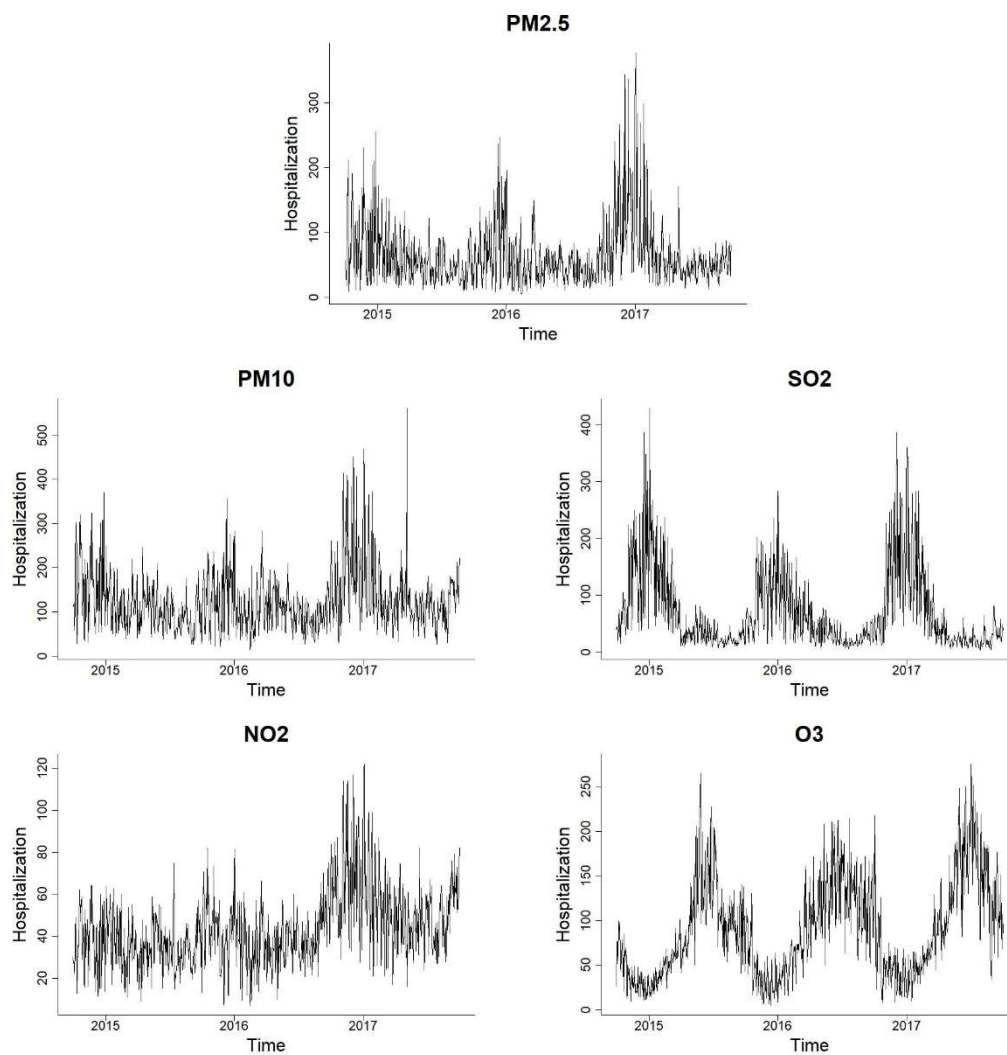

**Figure S2.** Time series of PM<sub>2.5</sub>, PM<sub>10</sub>, SO<sub>2</sub>, NO<sub>2</sub> and O<sub>3</sub> in Taiyuan, China, during 1st October 2014 to 30th September 2017.

Pneumonia

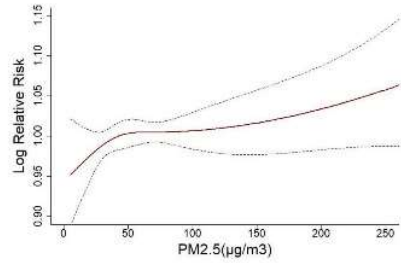

COPD

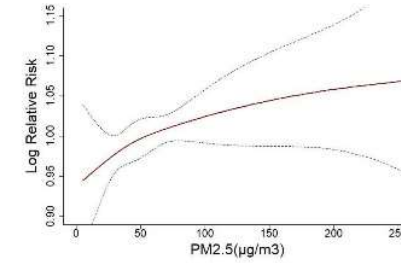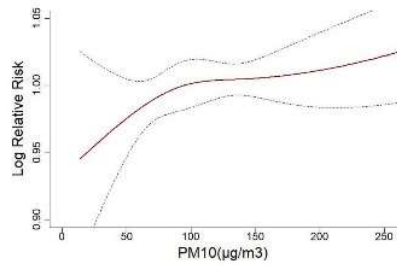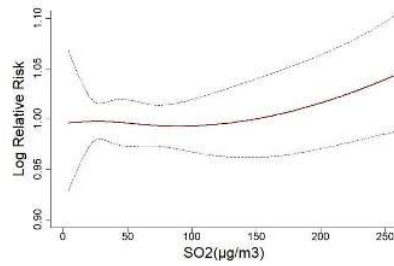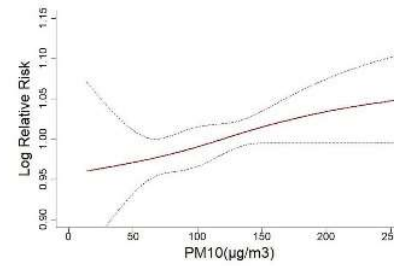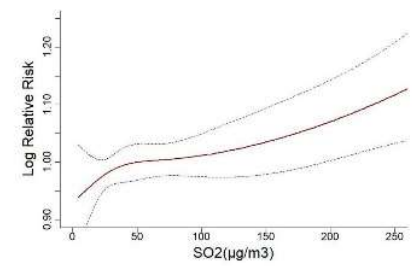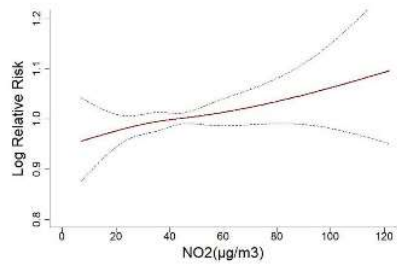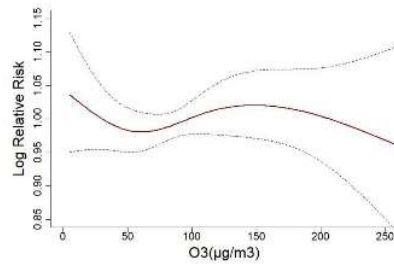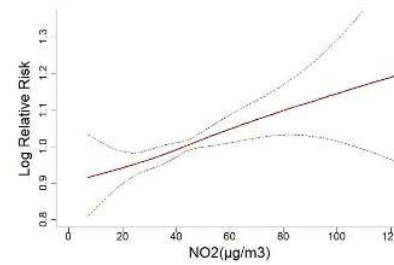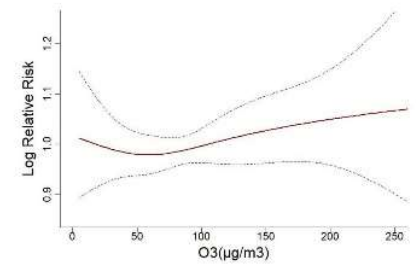

**Figure S3.** The exposure-response associations between five air pollutants and hospitalization for pneumonia and COPD. (The x-axis represented the concentration of air pollutants ( $\mu\text{g}/\text{m}^3$ ) at the current day, the Y-axis indicated Log relative risk of respiratory hospitalization. The blue lines were the 95% CI. All models were adjusted for time, temperature, relative humidity, weekend and public holiday.)

**Table S1.** The percent change and 95% CI for hospitalization due to respiratory disease associated with a 10-ug/m3 increases in air pollutants concentrations by gender and age in single-pollutant models in Taiyuan, China.

| Pollutants              | Male                  | Female                 | Age < 65 years         | Age ≥ 65 years         |
|-------------------------|-----------------------|------------------------|------------------------|------------------------|
| <b>PM<sub>2.5</sub></b> |                       |                        |                        |                        |
| lag0                    | 0.364(-0.012,0.741)   | 0.446(0.063,0.830) *   | 0.403(0.046,0.761) *   | 0.370(-0.140,0.882)    |
| lag1                    | 0.350(0.004,0.697) *  | 0.331(-0.022,0.686)    | 0.411(0.081,0.741) *   | 0.137(-0.329,0.605)    |
| lag2                    | 0.116(-0.220,0.453)   | 0.271(-0.071,0.613)    | 0.280(-0.039,0.600)    | -0.104(-0.555,0.348)   |
| lag3                    | -0.014(-0.349,0.323)  | 0.047(-0.295,0.391)    | 0.153(-0.167,0.473)    | -0.379(-0.830,0.074)   |
| lag4                    | -0.043(-0.380,0.294)  | 0.046(-0.297,0.391)    | 0.145(-0.175,0.467)    | -0.439(-0.891,0.016)   |
| lag5                    | -0.035(-0.374,0.305)  | 0.132(-0.213,0.478)    | 0.116(-0.207,0.439)    | -0.198(-0.655,0.260)   |
| lag01                   | 0.496(0.071,0.922) *  | 0.535(0.101,0.971) *   | 0.567(0.163,0.972) **  | 0.338(-0.237,0.915)    |
| lag02                   | 0.482(0.011,0.954) *  | 0.615(0.135,1.098) *   | 0.648(0.201,1.097) **  | 0.205(-0.430,0.843)    |
| lag03                   | 0.429(-0.088,0.948)   | 0.587(0.059,1.117) *   | 0.679(0.188,1.173) **  | -0.043(-0.739,0.659)   |
| lag04                   | 0.383(-0.178,0.949)   | 0.584(0.009,1.162) *   | 0.728(0.194,1.265) **  | -0.290(-1.047,0.474)   |
| lag05                   | 0.356(-0.251,0.967)   | 0.643(0.021,1.269) *   | 0.775(0.199,1.355) **  | -0.389(-1.207,0.436)   |
| <b>PM<sub>10</sub></b>  |                       |                        |                        |                        |
| lag0                    | 0.245(0.004,0.487) *  | 0.273(-0.261,0.810) *  | 0.252(0.022,0.482) *   | 0.270(-0.055,0.595)    |
| lag1                    | 0.251(0.018,0.485) *  | 0.202(-0.038,0.442)    | 0.292(0.068,0.515) *   | 0.056(-0.258,0.371)    |
| lag2                    | 0.129(-0.105,0.364)   | 0.209(-0.030,0.449)    | 0.238(0.015,0.462) *   | -0.053(-0.369,0.264)   |
| lag3                    | 0.042(-0.193,0.276)   | 0.093(-0.147,0.333)    | 0.158(-0.066,0.381)    | -0.200(-0.516,0.116)   |
| lag4                    | 0.063(-0.169,0.295)   | 0.094(-0.144,0.332)    | 0.174(-0.047,0.396)    | -0.203(-0.514,0.109)   |
| lag5                    | 0.029(-0.204,0.263)   | 0.122(-0.116,0.361)    | 0.123(-0.099,0.346)    | -0.09(-0.403,0.223)    |
| lag01                   | 0.331(0.057,0.606) *  | 0.315(0.034,0.597) *   | 0.363(0.101,0.625) **  | 0.210(-0.158,0.580)    |
| lag02                   | 0.349(0.043,0.657) *  | 0.382(0.068,0.698) *   | 0.438(0.146,0.731) **  | 0.145(-0.268,0.560)    |
| lag03                   | 0.338(0.001,0.676) *  | 0.394(0.049,0.741) *   | 0.478(0.157,0.800) **  | 0.026(-0.428,0.482)    |
| lag04                   | 0.347(-0.017,0.712)   | 0.415(0.042,0.790) *   | 0.534(0.187,0.882) **  | -0.078(-0.567,0.414)   |
| lag05                   | 0.347(-0.043,0.738)   | 0.457(0.056,0.859) *   | 0.571(0.199,0.944) **  | -0.117(-0.641,0.410)   |
| <b>SO<sub>2</sub></b>   |                       |                        |                        |                        |
| lag0                    | 0.362(0.042,0.684) *  | 0.486(0.158,0.814) **  | 0.399(0.095,0.705) *   | 0.460(0.023,0.899) *   |
| lag1                    | 0.460(0.149,0.772) ** | 0.344(0.026,0.664) *   | 0.407(0.110,0.704) **  | 0.442(0.021,0.865) *   |
| lag2                    | 0.255(-0.047,0.557)   | 0.400(0.093,0.709) *   | 0.338(0.050,0.627) *   | 0.247(-0.157,0.652)    |
| lag3                    | 0.058(-0.242,0.358)   | 0.190(-0.115,0.497)    | 0.175(-0.111,0.462)    | -0.048(-0.448,0.353)   |
| lag4                    | -0.033(-0.333,0.268)  | 0.019(-0.287,0.327)    | 0.128(-0.159,0.415)    | -0.391(-0.791,0.011)   |
| lag5                    | -0.063(-0.364,0.238)  | -0.07(-0.377,0.238)    | 0.000(-0.287,0.288)    | -0.240(-0.640,0.162)   |
| lag01                   | 0.621(0.234,1.009) ** | 0.627(0.231,1.025) **  | 0.605(0.238,0.973) **  | 0.692(0.162,1.224) *   |
| lag02                   | 0.735(0.293,1.180) ** | 0.845(0.391,1.301) *** | 0.783(0.363,1.204) *** | 0.781(0.176,1.390) *   |
| lag03                   | 0.715(0.229,1.203) ** | 0.900(0.403,1.400) *** | 0.843(0.383,1.305) *** | 0.674(0.014,1.338) *   |
| lag04                   | 0.649(0.128,1.172) *  | 0.848(0.314,1.385) **  | 0.875(0.383,1.370) *** | 0.370(-0.337,1.082)    |
| lag05                   | 0.587(0.031,1.145) *  | 0.772(0.201,1.347) **  | 0.845(0.321,1.373) **  | 0.206(-0.548,0.966)    |
| <b>NO<sub>2</sub></b>   |                       |                        |                        |                        |
| lag0                    | 1.526(0.442,2.620) ** | 2.029(0.900,3.170) *** | 1.408(0.373,2.454) **  | 2.662(1.172,4.173) *** |
| lag1                    | 1.049(-0.013,2.122)   | 0.968(-0.119,2.068)    | 0.883(-0.133,1.909)    | 1.431(0.006,2.877) *   |
| lag2                    | 1.120(0.079,2.171) *  | 1.406(0.337,2.485) **  | 1.299(0.300,2.307) *   | 1.062(-0.320,2.464)    |
| lag3                    | 0.737(-0.303,1.788)   | 1.407(0.336,2.488) **  | 1.134(0.134,2.144) *   | 0.654(-0.727,2.054)    |
| lag4                    | 0.234(-0.804,1.282)   | 0.530(-0.536,1.608)    | 0.724(-0.274,1.733)    | -0.668(-2.032,0.715)   |
| lag5                    | 0.187(-0.849,1.234)   | 0.281(-0.783,1.356)    | 0.379(-0.617,1.385)    | -0.157(-1.528,1.233)   |
| lag01                   | 1.741(0.490,3.008) ** | 2.022(0.727,3.334) **  | 1.548(0.352,2.757) *   | 2.783(1.071,4.524) **  |
| lag02                   | 2.119(0.720,3.539) ** | 2.522(1.077,3.987) *** | 2.061(0.723,3.418) **  | 2.936(1.037,4.871) **  |
| lag03                   | 2.311(0.775,3.871) ** | 3.045(1.458,4.658) *** | 2.476(1.004,3.970) **  | 2.988(0.916,5.102) **  |
| lag04                   | 2.304(0.636,4.001) ** | 3.144(1.419,4.898) *** | 2.719(1.117,4.347) *** | 2.437(0.201,4.723) *   |
| lag05                   | 2.344(0.538,4.182) *  | 3.216(1.347,5.119) *** | 2.854(1.117,4.620) **  | 2.293(-0.120,4.764)    |
| <b>O<sub>3</sub></b>    |                       |                        |                        |                        |
| lag0                    | 0.099(-0.456,0.658)   | 0.059(-0.521,0.642)    | 0.05(-0.488,0.591)     | 0.273(-0.484,1.036)    |
| lag1                    | 0.312(-0.236,0.862)   | 0.428(-0.143,1.002)    | 0.390(-0.141,0.923)    | 0.313(-0.417,1.048)    |
| lag2                    | 0.023(-0.515,0.565)   | -0.115(-0.676,0.449)   | -0.004(-0.526,0.521)   | -0.083(-0.794,0.633)   |
| lag3                    | -0.232(-0.770,0.309)  | -0.161(-0.722,0.404)   | -0.270(-0.791,0.255)   | -0.017(-0.730,0.702)   |
| lag4                    | -0.120(-0.657,0.420)  | 0.003(-0.557,0.566)    | -0.169(-0.689,0.354)   | 0.207(-0.505,0.924)    |
| lag5                    | 0.418(-0.122,0.960)   | 0.407(-0.155,0.972)    | 0.391(-0.131,0.916)    | 0.495(-0.220,1.216)    |
| lag01                   | 0.289(-0.360,0.943)   | 0.344(-0.333,1.027)    | 0.311(-0.318,0.944)    | 0.421(-0.458,1.309)    |
| lag02                   | 0.250(-0.468,0.972)   | 0.211(-0.538,0.965)    | 0.251(-0.444,0.950)    | 0.279(-0.683,1.251)    |
| lag03                   | 0.098(-0.676,0.879)   | 0.102(-0.707,0.918)    | 0.080(-0.671,0.836)    | 0.229(-0.805,1.274)    |
| lag04                   | 0.031(-0.796,0.865)   | 0.095(-0.771,0.968)    | -0.009(-0.811,0.799)   | 0.313(-0.791,1.429)    |
| lag05                   | 0.220(-0.661,1.109)   | 0.277(-0.645,1.207)    | 0.170(-0.685,1.032)    | 0.530(-0.645,1.719)    |

**Table S2.** Sensitivity analysis for health effects of ambient air pollution on respiratory hospitalization by changing df=2-5 per year of time, temperature and relative humidity in Taiyuan, China (health effects were showed as percent changes and 95% CI with per 10-ug/m3 increment in air pollutants).

| Variables              | PM <sub>2.5</sub>    | PM <sub>10</sub>     | SO <sub>2</sub>       | NO <sub>2</sub>       |
|------------------------|----------------------|----------------------|-----------------------|-----------------------|
| Time                   |                      |                      |                       |                       |
| df=2/year              | 0.407(0.066,0.750) * | 0.242(0.020,0.464) * | 0.422(0.134,0.710) ** | 1.225(0.250,2.208) ** |
| df=3/year              | 0.424(0.080,0.770) * | 0.278(0.055,0.501) * | 0.485(0.195,0.776) ** | 1.755(0.745,2.776) ** |
| df=4/year <sup>a</sup> | 0.397(0.045,0.751) * | 0.257(0.031,0.484) * | 0.407(0.106,0.708) ** | 1.682(0.664,2.711) ** |
| df=5/year              | 0.296(0.093,0.744) * | 0.216(0.024,0.430) * | 0.360(0.103,0.719) ** | 1.350(0.346,2.364) ** |
| Average temperature    |                      |                      |                       |                       |
| df=2                   | 0.397(0.045,0.751) * | 0.257(0.031,0.484) * | 0.407(0.106,0.708) ** | 1.682(0.664,2.711) ** |
| df=3 <sup>a</sup>      | 0.397(0.045,0.751) * | 0.257(0.031,0.484) * | 0.407(0.106,0.708) ** | 1.682(0.664,2.711) ** |
| df=4                   | 0.369(0.019,0.721) * | 0.232(0.007,0.458) * | 0.416(0.118,0.715) ** | 1.504(0.486,2.531) ** |
| df=5                   | 0.372(0.022,0.723) * | 0.232(0.007,0.458) * | 0.413(0.115,0.713) ** | 1.493(0.477,2.519) ** |
| Relative humidity      |                      |                      |                       |                       |
| df=2                   | 0.397(0.045,0.751) * | 0.257(0.031,0.484) * | 0.407(0.106,0.708) ** | 1.682(0.664,2.711) ** |
| df=3 <sup>a</sup>      | 0.397(0.045,0.751) * | 0.257(0.031,0.484) * | 0.407(0.106,0.708) ** | 1.682(0.664,2.711) ** |
| df=4                   | 0.397(0.045,0.751) * | 0.257(0.031,0.484) * | 0.407(0.106,0.708) ** | 1.684(0.665,2.714) ** |
| df=5                   | 0.397(0.045,0.751) * | 0.257(0.031,0.484) * | 0.407(0.106,0.708) ** | 1.683(0.665,2.712) ** |

*a* represented the df used in the present study. \*  $p < 0.05$ , \*\*  $p < 0.01$ , \*\*\*  $p < 0.001$ , O<sub>3</sub> wasn't included in the sensitivity analysis because the effects on respiratory hospitalization had no statistical significance.
